# Supplementary material for: Antiretroviral therapy response among HIV-2 infected patients: a systematic review
Source: PubMed Central journal article supplement (PMC4156654; doi:10.1186/1471-2334-14-461), 2014-08-26

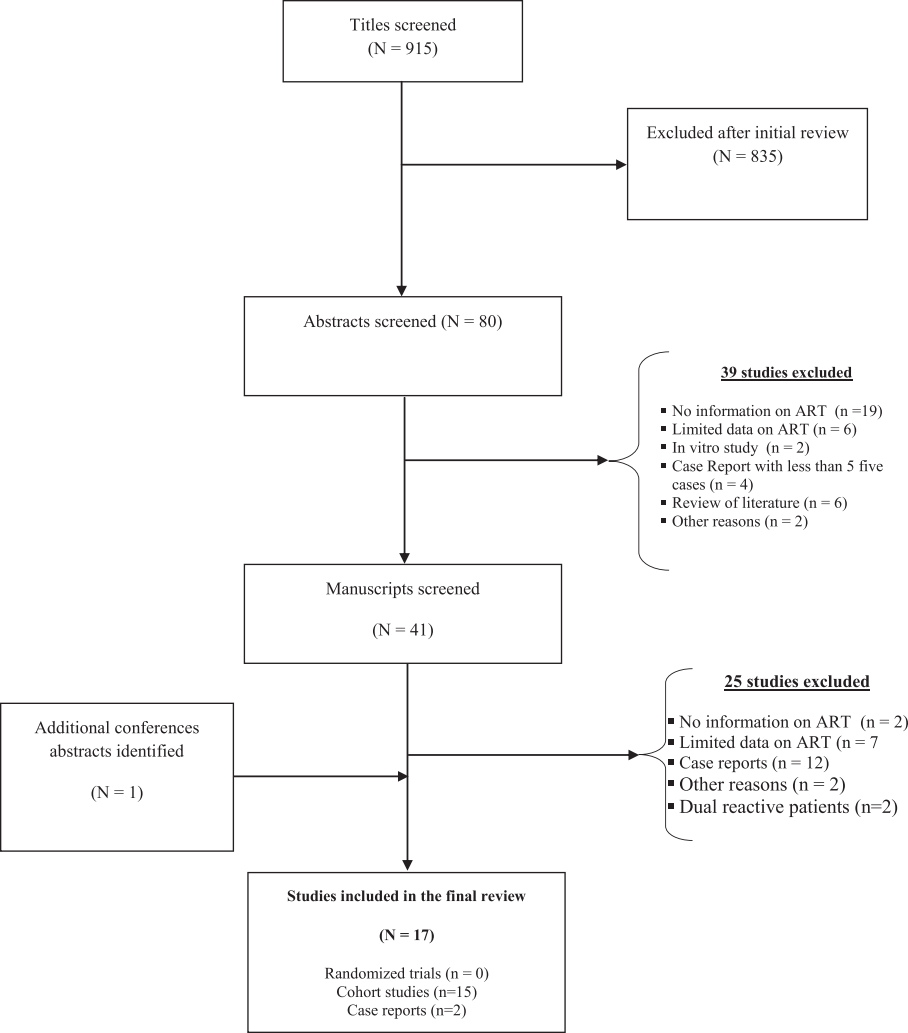

Supplement: 12879_2013_3764_MOESM1_ESM.pdf [file 12879_2013_3764_MOESM1_ESM.pdf]
